# Supplementary material for: Identification of Gene Modules Associated with Low Temperatures Response in Bambara Groundnut by Network-Based Analysis
Source: PLoS One. 2016 Feb 9;11(2):e0148771. doi: 10.1371/journal.pone.0148771 (PMC4747569; doi:10.1371/journal.pone.0148771)
Supplement: S3 Table — (XLSX) [file pone.0148771.s004.xlsx]

## Sheet: Sheet1
Probeset ID	sub_optimal.to.optimal	Status	very_sub_optimal.to.optimal	Status
Gma.10282.2.S1_at	2.23111	Up	1.50144	Up
Gma.10820.1.S1_at	-1.11945	Down	-1.15344	Down
Gma.10885.1.S1_at	-0.375415	Down	-0.900101	Down
Gma.10899.1.S1_at	-0.639778	Down	-0.34431	Down
Gma.1166.3.S1_x_at	-0.440866	Down	-1.47952	Down
Gma.12309.1.S1_at	1.68282	Up	2.1321	Up
Gma.12419.1.S1_at	0.824211	Up	0.869326	Up
Gma.12560.1.A1_at	0.508979	Up	0.307013	Up
Gma.12911.1.A1_s_at	4.15364	Up	4.51786	Up
Gma.13045.1.S1_at	5.15875	Up	6.63268	Up
Gma.13292.1.S1_at	-0.915875	Down	-1.54758	Down
Gma.13296.1.S1_s_at	0.350879	Up	-0.325501	Down
Gma.13316.2.S1_a_at	0.456559	Up	0.401664	Up
Gma.13616.1.A1_at	1.22884	Up	1.10192	Up
Gma.13910.1.S1_at	1.3647	Up	3.53642	Up
Gma.149.1.S1_at	1.43805	Up	1.39954	Up
Gma.15424.1.S1_at	-0.859258	Down	-0.903439	Down
Gma.15464.1.S1_x_at	-1.49208	Down	-1.50521	Down
Gma.15578.1.S1_at	1.57381	Up	1.70284	Up
Gma.15710.1.S1_at	1.91339	Up	2.10342	Up
Gma.15811.1.S1_at	0.733478	Up	-0.849705	Down
Gma.16.1.S1_s_at	0.468197	Up	0.534919	Up
Gma.16117.1.S1_at	0.409623	Up	0.615187	Up
Gma.16524.2.S1_a_at	0.205943	Up	0.593109	Up
Gma.16554.2.S1_at	-1.4943	Down	-1.03056	Down
Gma.17385.1.S1_at	4.09445	Up	3.6709	Up
Gma.17431.1.S1_at	1.74678	Up	1.80092	Up
Gma.17628.1.S1_at	0.478489	Up	0.548531	Up
Gma.17750.1.A1_s_at	1.46894	Up	1.1551	Up
Gma.17756.1.A1_s_at	1.13503	Up	1.14273	Up
Gma.1796.1.S1_at	1.42253	Up	1.22984	Up
Gma.2069.1.S1_at	0.623133	Up	0.707015	Up
Gma.2555.1.S1_s_at	2.61858	Up	4.60799	Up
Gma.2558.2.S1_a_at	-0.861693	Down	-0.679654	Down
Gma.2776.1.S1_at	1.32898	Up	1.82437	Up
Gma.2776.2.S1_a_at	1.06684	Up	1.55718	Up
Gma.2776.2.S1_s_at	1.18531	Up	1.71076	Up
Gma.2911.1.S1_x_at	1.1883	Up	1.81442	Up
Gma.3524.1.S1_at	-1.39282	Down	-1.22392	Down
Gma.3835.1.S1_at	1.6453	Up	1.12498	Up
Gma.4091.1.S1_a_at	0.539378	Up	0.760776	Up
Gma.412.1.S1_at	0.846421	Up	0.503646	Up
Gma.4392.1.S1_at	-1.3219	Down	-0.86061	Down
Gma.4593.1.S1_x_at	-0.453724	Down	-1.21311	Down
Gma.4836.1.S1_s_at	-0.815959	Down	0.503896	Up
Gma.4889.1.S1_at	-3.53073	Down	-2.5121	Down
Gma.5402.1.S1_at	-0.90225	Down	-0.899385	Down
Gma.5513.1.S1_s_at	1.79204	Up	1.67748	Up
Gma.5513.1.S1_x_at	1.98181	Up	1.71364	Up
Gma.5903.2.S1_a_at	0.252948	Up	0.667459	Up
Gma.6257.2.S1_a_at	0.77576	Up	1.41444	Up
Gma.6370.2.S1_a_at	1.63157	Up	1.35145	Up
Gma.6423.1.S1_at	2.25846	Up	2.21731	Up
Gma.6670.1.S1_at	-2.55448	Down	-1.87887	Down
Gma.7161.1.S1_at	-0.911785	Down	-1.5049	Down
Gma.7236.1.S1_at	0.605279	Up	0.556182	Up
Gma.7631.1.A1_at	0.566699	Up	0.765074	Up
Gma.7800.1.A1_s_at	0.990105	Up	1.056	Up
Gma.8053.1.S1_at	-1.28282	Down	-1.41426	Down
GmaAffx.1301.53.S1_at	-3.47814	Down	-2.71568	Down
GmaAffx.17279.1.S1_at	1.51112	Up	2.45017	Up
GmaAffx.20918.1.S1_at	1.46051	Up	2.70159	Up
GmaAffx.20956.1.S1_at	1.23031	Up	0.791638	Up
GmaAffx.21923.1.A1_at	-1.23275	Down	-0.692523	Down
GmaAffx.22343.2.S1_s_at	0.401732	Up	0.615881	Up
GmaAffx.23184.1.S1_at	0.982706	Up	0.683407	Up
GmaAffx.24949.1.S1_at	2.07194	Up	1.68955	Up
GmaAffx.26145.1.S1_at	0.597799	Up	0.649309	Up
GmaAffx.26359.1.S1_at	-2.89492	Down	-1.55007	Down
GmaAffx.28886.1.A1_at	0.917187	Up	1.06795	Up
GmaAffx.29956.1.S1_s_at	-0.516125	Down	-0.345534	Down
GmaAffx.31247.1.S1_at	1.465	Up	1.44244	Up
GmaAffx.33657.1.S1_at	2.37012	Up	3.48263	Up
GmaAffx.36315.1.S1_at	2.23115	Up	2.50597	Up
GmaAffx.39130.1.S1_at	-1.18167	Down	-2.31185	Down
GmaAffx.42064.1.S1_at	-1.02209	Down	-1.48296	Down
GmaAffx.44319.1.S1_at	2.88164	Up	3.90205	Up
GmaAffx.48291.1.S1_at	0.924367	Up	0.407651	Up
GmaAffx.52122.1.S1_at	2.10703	Up	2.37877	Up
GmaAffx.53155.1.S1_at	0.355131	Up	0.551585	Up
GmaAffx.54673.1.S1_at	0.822161	Up	1.64206	Up
GmaAffx.55864.1.S1_at	6.35878	Up	7.96402	Up
GmaAffx.58990.1.S1_at	1.66641	Up	1.78827	Up
GmaAffx.59856.1.S1_at	4.07562	Up	3.39792	Up
GmaAffx.60768.1.S1_at	-0.556842	Down	-1.09618	Down
GmaAffx.70071.1.S1_at	1.08797	Up	0.777322	Up
GmaAffx.7166.1.S1_at	4.83394	Up	5.79494	Up
GmaAffx.73059.1.S1_at	-1.35791	Down	-1.3061	Down
GmaAffx.76849.1.S1_at	0.940534	Up	0.97604	Up
GmaAffx.76950.1.S1_at	0.918903	Up	0.608945	Up
GmaAffx.77709.1.S1_at	2.51288	Up	2.35657	Up
GmaAffx.77888.1.S1_at	2.20031	Up	1.91103	Up
GmaAffx.78028.1.S1_at	0.657478	Up	0.702639	Up
GmaAffx.79727.1.S1_at	-0.505947	Down	-0.799118	Down
GmaAffx.79990.1.S1_s_at	1.26558	Up	3.92511	Up
GmaAffx.80802.1.S1_at	0.786962	Up	0.818406	Up
GmaAffx.81915.1.S1_at	3.84942	Up	4.16955	Up
GmaAffx.83619.1.S1_at	1.57009	Up	1.61908	Up
GmaAffx.86571.1.S1_at	-1.21803	Down	-1.38263	Down
GmaAffx.86914.1.S1_at	-0.596059	Down	-0.679535	Down
GmaAffx.87594.1.S1_at	-1.47064	Down	-0.584897	Down
GmaAffx.90341.1.S1_s_at	1.06899	Up	1.22964	Up
GmaAffx.90488.1.S1_s_at	-0.995743	Down	0.700896	Up
GmaAffx.91328.1.S1_at	-1.07342	Down	-1.18107	Down
GmaAffx.92017.1.S1_s_at	-0.378294	Down	-1.21599	Down
GmaAffx.92133.1.S1_s_at	-0.747697	Down	-0.883219	Down
GmaAffx.92390.1.S1_s_at	0.604631	Up	0.263344	Up
GmaAffx.92946.1.S1_at	1.30775	Up	2.15428	Up
GmaAffx.92994.1.S1_s_at	0.426251	Up	0.394713	Up
GmaAffx.93493.1.S1_s_at	2.21468	Up	2.51098	Up
